# Supplementary material for: Similar scaling laws for earthquakes and Cascadia slow-slip events
Source: Springer Nature journal article supplement (doi:10.1038/s41586-019-1673-6), 2019-10-23
Supplement: MOESM3 [file 41586_2019_1673_MOESM3_ESM.xlsx]

## Sheet: Fig2_a
Time_Mw	Mw
2007.06	5.6357
2007.08	5.90362
2007.08	6.66263
2007.1	5.47939
2007.47	6.14062
2007.47	5.65483
2007.53	5.83006
2007.57	5.97838
2008.28	6.04166
2008.38	6.55089
2008.38	5.49986
2008.53	5.38117
2008.92	5.63097
2009.16	5.49587
2009.21	6.16867
2009.36	6.48535
2009.36	5.31567
2009.5	5.57036
2009.63	6.48539
2009.62	5.43949
2009.62	5.45848
2010.12	5.68862
2010.11	5.49243
2010.64	6.5124
2010.63	5.75508
2011.05	5.37306
2011.41	5.72064
2011.46	6.31448
2011.44	5.4242
2011.64	6.37329
2011.66	5.60726
2011.67	5.31983
2011.79	5.85844
2012.71	6.49209
2012.7	5.55321
2012.77	5.86797
2012.81	6.22082
2013.23	6.26541
2013.21	5.68309
2013.61	5.73523
2013.74	6.57051
2013.74	5.704
2014.14	6.08958
2014.18	5.55318
2014.44	5.73535
2014.46	5.783
2014.66	6.2593
2014.69	6.02153
2014.69	5.30747
2014.69	5.66315
2014.92	6.40157
2014.93	5.39166
2015.81	6.1539
2016.01	6.64003
2015.97	5.62067
2015.97	5.73019
2016.01	5.76572
2016.43	5.43789
2017.22	6.57231
2017.14	5.43409
2017.22	5.36576
2017.34	5.8612
2017.33	5.48552
2017.63	5.49221

## Sheet: Fig2_b
Lat_SSE	Time_SSE	Mo_rate_SSE
47.5882	2015.91	0.000354012
41.3241	2014.61	0.00125285
47.0596	2015.91	0.00145664
48.6798	2017.17	0.00199056
45.3103	2011.41	0.00221141
46.2612	2009.68	0.00255484
44.7256	2016.17	0.00301827
47.6951	2011.71	0.00454622
48.5489	2013.67	0.00481259
44.7183	2015.91	0.00548218
48.8004	2017.17	0.00601583
48.6987	2011.59	0.00635021
44.7245	2011.39	0.00639137
46.637	2007.04	0.00644862
48.7082	2016.17	0.00652916
49.1188	2016.13	0.00787137
40.3661	2012.78	0.00808021
48.2184	2008.45	0.00849923
46.0016	2015.95	0.0102175
49.1709	2016.19	0.0105717
47.5882	2013.8	0.0109939
47.8502	2012.69	0.0110986
45.0421	2009.58	0.0111333
44.5608	2015.93	0.0120769
48.0535	2007.09	0.012134
48.7872	2017.16	0.0121446
47.4289	2016.15	0.0122824
47.7475	2017.14	0.0124224
45.9469	2015.92	0.0136637
47.9138	2011.52	0.0141416
48.6439	2017.17	0.0141605
45.3093	2013.3	0.0147865
47.5414	2011.54	0.0149627
46.7917	2016.16	0.0149732
48.8624	2011.67	0.015086
46.159	2016.04	0.0152653
47.5429	2013.75	0.0156343
44.2451	2015.9	0.016287
48.0731	2016.09	0.0172636
42.1169	2014.72	0.0172846
46.9041	2015.92	0.0184065
47.1162	2011.52	0.0186796
48.0731	2008.3	0.0193171
46.1544	2007.02	0.0195117
49.1645	2016.17	0.0198418
48.9567	2017.17	0.0202183
48.8603	2010.73	0.020219
48.9596	2010.62	0.0213124
49.2606	2016.16	0.0222019
48.1542	2017.16	0.023144
46.0007	2011.42	0.0233345
48.8554	2013.67	0.0238637
46.0007	2015.93	0.0240794
48.3777	2008.46	0.0242525
45.2027	2011.55	0.0253882
46.0023	2015.93	0.0254246
47.5882	2016.19	0.0261469
48.4962	2011.49	0.0268919
44.5098	2015.92	0.0273061
48.5311	2015.91	0.0279037
48.3802	2011.59	0.0282163
47.9138	2011.52	0.0285305
46.9002	2015.94	0.0285991
46.2666	2009.71	0.0287904
48.3777	2009.3	0.029316
44.0826	2015.96	0.0294236
48.007	2010.69	0.0301731
48.8118	2011.51	0.0308801
48.8624	2016.05	0.0310789
48.5418	2010.73	0.0312394
46.7984	2007.01	0.031321
48.81	2014.98	0.0314179
47.9138	2011.52	0.0323494
48.3536	2017.09	0.0335768
48.1796	2009.42	0.0336168
45.6764	2007.51	0.0341219
48.1542	2016.15	0.0342567
46.1576	2015.96	0.0345559
47.2204	2017.23	0.0350844
44.3504	2011.54	0.0355538
48.81	2008.3	0.0355908
44.403	2015.9	0.0360769
48.8643	2011.66	0.0361875
47.0611	2008.44	0.0363341
44.3488	2015.93	0.0363741
45.0433	2015.99	0.0368007
47.9128	2013.82	0.0372982
45.0371	2009.7	0.0374357
48.2324	2012.65	0.0377377
48.5244	2017.15	0.0378539
48.8579	2010.6	0.0380447
48.0592	2007.07	0.038265
46.6391	2009.69	0.0389345
44.4014	2015.91	0.038948
47.9025	2007.07	0.0392227
48.8554	2014.98	0.0403611
49.161	2007.02	0.0409126
48.2184	2011.58	0.0411742
47.9086	2010.71	0.041765
45.6269	2015.91	0.0419615
48.8032	2013.67	0.041987
47.0623	2009.63	0.0423073
46.5854	2015.97	0.0427296
47.3782	2011.54	0.0428277
46.9585	2012.76	0.0435317
47.115	2012.66	0.0439469
47.7475	2017.27	0.0439681
45.6291	2007.43	0.0441164
48.9981	2017.09	0.0443647
47.7016	2015.96	0.0443821
49.0018	2017.11	0.044728
44.3518	2015.96	0.0448235
45.6291	2007.43	0.0450514
47.3821	2013.79	0.0453288
47.8943	2016.07	0.0455156
47.8609	2016.01	0.0455411
45.6764	2016.18	0.0456946
48.8462	2007	0.0460223
48.9649	2010.64	0.0461116
46.9041	2016.18	0.0465204
48.2184	2012.8	0.0468081
47.3765	2010.71	0.0470072
47.1137	2013.3	0.0474898
48.007	2007.14	0.047718
45.3033	2011.44	0.0480722
45.6764	2016	0.0484128
48.5244	2017.11	0.0488509
47.2152	2007.14	0.0492566
44.8286	2009.56	0.0504586
48.5501	2013.7	0.0509805
48.1575	2016.04	0.0512529
48.1575	2016.04	0.0512529
47.5338	2013.79	0.0513695
49.4306	2015.95	0.0513709
41.2175	2014.6	0.0515026
47.9138	2012.81	0.0521673
47.4289	2013.67	0.0524677
48.4689	2017.16	0.0543969
48.6201	2017.09	0.0544697
48.1796	2008.31	0.0544807
49.1158	2013.67	0.055236
45.1457	2015.94	0.0559724
49.2606	2017.15	0.0568035
48.8554	2010.61	0.0572251
48.2324	2010.69	0.0572873
48.0592	2010.66	0.0574013
48.7011	2009.29	0.0577224
48.338	2008.44	0.0577517
48.4725	2017.13	0.0578395
47.7016	2017.23	0.0579514
44.0788	2016.19	0.0579615
47.8524	2013.82	0.0588326
49.1678	2016.18	0.0594642
42.3273	2014.72	0.0595265
48.0014	2016.05	0.0595507
47.5375	2015.94	0.0596099
47.3765	2017.28	0.0599838
47.9047	2016.19	0.0603606
48.306	2013.7	0.0605382
48.9624	2009.31	0.0608516
45.8422	2007.42	0.0610967
45.2038	2013.26	0.0614262
47.9047	2015.9	0.0615472
48.1787	2011.56	0.0616871
48.8118	2013.79	0.0617295
48.3719	2016.14	0.0618542
48.8134	2017.09	0.0620391
45.4697	2013.24	0.0620545
48.6281	2017.17	0.0620553
44.0808	2015.93	0.0621755
45.6819	2013.28	0.0623558
48.9624	2008.31	0.0625131
47.7351	2016.06	0.0632744
48.5395	2017.16	0.0637974
46.6324	2015.92	0.0641659
48.2061	2012.74	0.0642421
47.5207	2016.01	0.0644194
47.8609	2007.12	0.0644799
47.5403	2013.8	0.0646603
48.6507	2010.73	0.0650901
48.4759	2017.11	0.0654748
48.8057	2011.58	0.0659843
49.1055	2007.04	0.0661482
47.2204	2012.64	0.0662544
43.2871	2014.19	0.0666953
46.1019	2011.53	0.0669914
41.376	2012.74	0.0672624
49.2683	2016.15	0.0687683
47.381	2012.65	0.0687932
48.0661	2016.19	0.069017
46.9049	2016.13	0.0690591
47.5375	2011.7	0.0695517
48.2315	2013.82	0.0698779
45.6291	2007.42	0.0699742
48.6566	2013.71	0.070246
45.3577	2016.06	0.0704761
48.4725	2017.13	0.0704917
48.0194	2008.3	0.070777
47.2696	2007.14	0.0711742
47.0643	2016.17	0.0714274
48.482	2009.33	0.0717469
47.8609	2016.11	0.0723782
48.0731	2012.8	0.0724086
47.9138	2012.65	0.0725294
49.0054	2017.16	0.0728573
46.2666	2013.22	0.0732166
49.4237	2016.19	0.073546
47.8502	2010.71	0.0737559
47.8524	2016.19	0.0739728
48.3167	2013.67	0.0741754
45.6291	2007.43	0.0748118
49.161	2012.63	0.075889
47.9138	2007.15	0.0762393
48.2315	2011.57	0.0762949
45.2038	2015.95	0.0766633
47.1137	2012.68	0.0772464
47.1178	2012.68	0.077373
48.7872	2017.13	0.0774618
47.9138	2011.52	0.0778191
49.4155	2013.67	0.0786955
46.9049	2016.01	0.0792696
47.273	2013.79	0.0798953
48.0194	2008.45	0.0805154
45.6281	2015.91	0.0808866
44.885	2016.1	0.0809207
47.9138	2011.51	0.0812056
47.859	2011.47	0.081575
45.3081	2015.94	0.081739
47.1162	2011.67	0.0817519
47.0634	2008.47	0.0818537
48.839	2017.13	0.0819903
46.1544	2013.25	0.0820503
40.6841	2012.77	0.0821569
47.6997	2014.67	0.082359
47.8561	2013.82	0.082527
46.9528	2015.96	0.0829074
46.3155	2016.04	0.0830243
48.5279	2017.11	0.0832593
48.4725	2007.03	0.0832631
45.4687	2009.56	0.0836323
47.8502	2009.38	0.0840329
46.1035	2011.39	0.0845179
44.9894	2011.54	0.0845812
47.7016	2012.69	0.0855114
48.461	2017.09	0.086317
47.2189	2017.26	0.0863542
47.437	2008.35	0.0864315
48.6464	2016.19	0.0864838
46.2629	2011.41	0.0867621
47.5916	2008.45	0.086901
49.252	2008.34	0.0877682
48.9981	2017.17	0.087929
47.2053	2007.04	0.0880297
48.8624	2014.96	0.0881556
46.3183	2009.71	0.0884544
45.9951	2016.09	0.0886897
48.3882	2016.07	0.088738
48.3356	2017.11	0.0888725
49.0087	2012.73	0.0888996
47.1178	2011.51	0.0895367
46.2666	2007.03	0.0895548
44.9864	2016.03	0.0895616
48.6836	2017.09	0.0895739
45.6745	2009.6	0.0909088
45.1983	2015.95	0.090918
49.0195	2016.02	0.0915715
47.5882	2010.72	0.0920025
48.7833	2017.17	0.0921048
48.007	2012.72	0.0925628
48.0592	2016.19	0.0927799
47.2189	2014.62	0.0940087
46.2612	2009.69	0.094704
48.338	2007.09	0.0947757
48.3167	2013.66	0.0954345
45.15	2011.54	0.0956692
48.5279	2016.04	0.0964932
45.9442	2014.47	0.096532
45.6764	2015.96	0.0967358
48.7943	2017.17	0.0968038
48.0136	2012.79	0.0978723
49.2683	2013.81	0.0980204
44.6706	2015.92	0.098024
48.866	2016.03	0.0980712
45.1964	2009.7	0.0981488
47.115	2011.67	0.0981768
45.1474	2013.32	0.0986261
48.3199	2013.75	0.0993403
47.5916	2014.67	0.100221
48.007	2012.67	0.10088
47.437	2007.1	0.100901
48.5244	2015.93	0.100991
46.2612	2016.14	0.101079
44.3471	2011.53	0.102913
47.2227	2017.23	0.103337
47.8502	2010.68	0.103353
48.3199	2010.61	0.103484
45.5226	2013.26	0.103577
47.7475	2015.94	0.103818
45.517	2007.5	0.104183
48.5458	2017.15	0.104296
46.2612	2013.22	0.104683
48.2289	2017.1	0.105604
48.8643	2010.71	0.105963
47.0643	2015.99	0.106813
48.9424	2012.76	0.106853
48.3255	2016.06	0.107104
47.9025	2010.62	0.107638
47.3836	2017.21	0.107651
47.1121	2007.14	0.10772
47.7319	2007.13	0.107799
47.2236	2010.69	0.108255
47.6931	2007.09	0.108477
47.6951	2017.13	0.108906
47.273	2017.26	0.109541
46.9578	2015.99	0.109542
48.9672	2009.33	0.111094
48.007	2013.68	0.111324
47.6983	2012.67	0.111374
48.4847	2007.01	0.112124
46.9544	2016.02	0.112607
45.517	2011.39	0.114973
48.6903	2013.7	0.115107
49.1091	2008.31	0.115284
48.7067	2011.56	0.115647
47.3836	2015.99	0.115817
48.6555	2012.75	0.115934
48.4725	2017.14	0.116343
48.9424	2017.17	0.116483
48.5501	2016.13	0.116809
48.6281	2017.09	0.117062
45.6291	2016.08	0.117956
49.2606	2008.31	0.118137
47.2772	2010.68	0.118404
47.9138	2015.95	0.118556
49.0195	2016.18	0.118699
45.3632	2016.08	0.119773
48.8643	2008.31	0.119832
45.6291	2007.42	0.119957
46.3137	2015.98	0.1203
48.687	2009.32	0.120396
41.6422	2014.71	0.120828
48.6541	2008.3	0.12097
41.8026	2014.71	0.120976
46.9557	2008.32	0.121064
47.2629	2015.97	0.121071
45.4687	2015.93	0.122057
48.7975	2008.34	0.12263
47.0623	2017.2	0.123253
48.3199	2016.11	0.12346
47.0611	2008.3	0.123587
47.9025	2013.69	0.124405
48.3199	2013.67	0.124836
40.4215	2008.32	0.1251
48.007	2012.63	0.125671
49.1645	2017.16	0.126027
47.1178	2010.67	0.126039
47.7552	2017.18	0.126277
48.8643	2017.28	0.126278
48.4962	2017.3	0.126499
48.2184	2015.92	0.126904
49.1188	2016.13	0.127289
47.8609	2009.41	0.127918
48.1542	2015.91	0.127938
44.6658	2011.54	0.127984
48.0592	2010.66	0.128206
47.1137	2017.19	0.128665
46.4763	2007.04	0.129117
47.2189	2009.43	0.129252
48.2324	2015.98	0.129504
49.0172	2016.04	0.129819
47.2714	2017.27	0.13028
49.2646	2016.16	0.130418
48.2315	2012.63	0.131288
48.8134	2013.76	0.132783
46.9578	2011.67	0.13308
47.2714	2011.69	0.13311
48.2095	2016.13	0.133286
47.5958	2013.75	0.133415
44.6676	2009.58	0.133449
47.1178	2016.18	0.133608
47.2765	2008.44	0.133793
48.9463	2017.11	0.13396
40.8952	2014.6	0.134023
45.6291	2007.43	0.135454
46.9557	2014.74	0.135462
44.7256	2016.13	0.135837
48.3356	2010.71	0.135897
48.9672	2017.19	0.13615
41.4804	2014.72	0.13667
49.0195	2007.03	0.136783
48.95	2017.16	0.137225
48.4948	2010.57	0.137261
48.4651	2016.19	0.138996
48.3167	2017.16	0.140454
46.2612	2015.95	0.140732
48.3777	2017.17	0.140929
45.6764	2016.01	0.142276
47.0596	2016.06	0.143251
44.4057	2015.96	0.143558
48.0696	2013.66	0.143956
45.6764	2016.17	0.144293
48.5311	2017.18	0.144698
48.7067	2011.47	0.144887
45.8338	2009.61	0.145369
47.9025	2015.95	0.145537
47.7455	2007.11	0.145981
48.4725	2017.13	0.146215
44.8777	2016.04	0.14628
41.1646	2014.61	0.146354
47.6951	2010.7	0.146666
47.8601	2011.54	0.146838
48.6439	2011.7	0.147328
47.5963	2010.72	0.147788
47.2772	2011.52	0.148141
41.3722	2014.71	0.148675
44.3488	2015.93	0.149019
48.6158	2017.17	0.149326
48.0535	2008.35	0.149598
47.8502	2013.77	0.15037
41.0587	2014.61	0.150558
48.071	2015.93	0.151066
45.7885	2011.42	0.151853
48.334	2010.72	0.151978
42.7512	2007.48	0.152072
48.6412	2010.62	0.152502
48.5489	2008.46	0.153057
48.7067	2016.13	0.153384
48.5341	2008.36	0.154138
48.2324	2013.66	0.155626
46.7935	2015.97	0.15606
48.4567	2017.1	0.157061
47.3782	2009.43	0.157128
48.3356	2015.93	0.157808
47.8601	2008.45	0.158028
45.3033	2011.52	0.158215
48.8554	2008.31	0.158502
44.3488	2011.53	0.158845
46.7447	2011.48	0.158846
47.9138	2011.51	0.15897
48.2324	2008.31	0.159171
40.6841	2014.61	0.159336
45.5215	2009.56	0.159407
48.7051	2012.77	0.159741
45.3632	2013.28	0.160624
45.1509	2011.39	0.16077
46.426	2013.22	0.160949
47.5963	2007.06	0.161147
45.9425	2015.9	0.161439
48.5458	2016.07	0.1624
48.338	2010.7	0.162633
47.5958	2009.42	0.16288
47.9138	2011.53	0.16317
48.8525	2012.74	0.163852
47.5882	2016.19	0.164108
41.057	2015.86	0.164116
48.7082	2011.56	0.164316
49.0146	2008.3	0.164939
48.0014	2016.02	0.165471
49.0146	2013.69	0.166246
48.2289	2017.1	0.16632
48.6507	2009.29	0.1666
48.3279	2011.58	0.167585
45.0444	2007.51	0.167918
47.0634	2016.16	0.16882
46.9585	2012.64	0.168849
48.1662	2008.46	0.168854
45.9968	2013.33	0.168974
47.8358	2016.05	0.168975
48.9981	2016.06	0.169146
46.4222	2007.03	0.16958
47.3615	2007.01	0.169858
45.6291	2013.24	0.170345
46.7392	2016.05	0.170745
45.8374	2007.49	0.170955
47.9128	2008.45	0.171084
48.0203	2008.46	0.171738
45.7832	2016.1	0.171983
45.7832	2016.06	0.172409
45.9968	2009.57	0.173464
49.0087	2013.66	0.173766
47.7475	2011.71	0.173937
47.9103	2016.08	0.174043
45.0433	2011.53	0.175408
41.0042	2014.6	0.175422
48.007	2016.14	0.175547
46.2612	2009.69	0.17565
49.1055	2016.16	0.176262
49.093	2017.3	0.177911
48.8643	2011.52	0.178019
47.7475	2016.15	0.178179
47.1061	2007.01	0.17843
40.7369	2014.6	0.178518
46.5854	2007.01	0.178626
49.0146	2008.3	0.178719
47.5358	2016.15	0.1811
40.419	2012.77	0.181517
48.0014	2013.69	0.181711
47.1171	2009.41	0.182117
48.9672	2007.01	0.182202
48.3777	2016.05	0.18252
44.1858	2016.03	0.182667
48.81	2013.81	0.182715
48.95	2017.11	0.183882
47.4349	2010.69	0.184113
45.3033	2011.44	0.184173
48.8603	2012.77	0.184569
49.2565	2017.17	0.185134
45.517	2013.25	0.185146
48.9672	2017.22	0.186102
48.0094	2013.82	0.186908
47.2777	2012.71	0.186941
49.0146	2008.3	0.187202
47.2765	2013.78	0.187577
44.5639	2015.92	0.188211
44.5082	2011.54	0.188224
48.071	2012.79	0.188426
48.3865	2011.49	0.188749
43.9232	2016.06	0.18988
47.2227	2014.86	0.191234
47.437	2011.62	0.191577
45.6291	2007.42	0.191941
44.6658	2015.92	0.192012
40.2594	2012.81	0.192787
47.8609	2013.8	0.192955
46.6341	2015.97	0.193057
47.2714	2015.98	0.193137
44.5651	2011.49	0.193339
40.419	2012.77	0.193742
47.273	2016.09	0.193936
48.8057	2011.69	0.195852
46.9568	2012.7	0.195873
46.7392	2009.63	0.196631
48.0014	2007.07	0.197499
48.9649	2008.36	0.197557
48.9649	2017.1	0.198537
45.9968	2014.51	0.198991
47.8877	2016.05	0.199025
48.7032	2017.14	0.199582
48.3908	2007.09	0.200317
46.4788	2016.07	0.201644
47.3782	2015.94	0.202012
45.6745	2009.6	0.202473
40.419	2012.77	0.202538
48.6242	2016.04	0.202782
45.3067	2009.56	0.202915
48.4948	2015.92	0.203124
47.8524	2015.9	0.203137
47.5423	2012.67	0.203613
45.517	2011.51	0.203705
48.0731	2011.56	0.203879
45.6745	2009.66	0.203889
48.0592	2010.65	0.204427
48.2289	2016.07	0.20479
44.7256	2016.17	0.206353
48.3687	2013.67	0.206415
48.8603	2014.98	0.206743
44.8839	2016.01	0.207194
48.2272	2008.45	0.208212
47.2772	2011.66	0.208241
48.3322	2011.48	0.208598
46.2656	2009.71	0.210493
47.37	2016.08	0.210537
47.5916	2016.11	0.210981
46.1544	2013.25	0.211077
48.6201	2017.17	0.211243
46.7975	2009.7	0.211425
47.5882	2010.71	0.211863
47.7007	2011.55	0.212008
44.827	2016.03	0.212027
47.859	2016.1	0.21268
47.0649	2007.05	0.213049
48.6383	2017.18	0.213227
48.9534	2016.18	0.213562
49.0117	2017.17	0.213624
46.2612	2007.04	0.214269
45.9442	2013.31	0.214455
47.6983	2014.68	0.215272
48.6351	2007.01	0.215276
47.5963	2010.67	0.215287
48.4894	2012.79	0.215603
41.2142	2014.72	0.216926
48.5279	2007.15	0.217205
48.221	2012.81	0.217508
46.5854	2009.7	0.217753
48.4847	2012.78	0.218298
48.6242	2017.09	0.218305
47.1162	2012.68	0.218619
48.7082	2016.18	0.218638
46.3183	2015.98	0.219637
47.0596	2013.24	0.220332
49.1091	2017.16	0.220579
44.7245	2016.03	0.220591
47.4135	2007.04	0.221652
44.5112	2015.91	0.221818
47.6951	2015.95	0.222072
47.2654	2007.01	0.222264
40.528	2008.32	0.223641
47.5429	2009.42	0.223674
47.4289	2016.1	0.224172
41.6939	2015.87	0.225396
47.8502	2010.71	0.225612
47.9047	2016.07	0.225625
48.007	2016.19	0.226126
46.7392	2007.13	0.226498
46.4748	2016.01	0.227452
47.4289	2015.91	0.227508
48.3302	2011.58	0.228037
47.2242	2011.64	0.228588
47.5429	2008.4	0.228593
45.6291	2007.44	0.228667
47.5882	2013.67	0.228759
48.7908	2016.04	0.229417
48.3749	2015.91	0.229589
48.007	2012.68	0.229807
48.6525	2011.49	0.229948
47.3782	2011.7	0.230049
49.0172	2017.19	0.230375
45.9951	2015.96	0.231162
48.8004	2016.18	0.231384
49.0146	2008.31	0.231481
48.9941	2017.18	0.231608
48.4915	2012.77	0.23184
47.8609	2008.42	0.232609
45.3632	2011.39	0.232839
47.5433	2007.05	0.233217
47.5958	2008.4	0.233319
44.5082	2009.58	0.233422
48.3719	2016.03	0.233435
44.3471	2015.91	0.233494
45.9425	2016.12	0.233503
40.7397	2014.61	0.233694
47.0596	2016.13	0.233774
48.334	2016.19	0.234141
46.6324	2016.19	0.234238
47.1171	2011.67	0.234582
47.273	2011.68	0.234678
46.1073	2007.06	0.234961
47.8524	2013.69	0.235277
48.2289	2017.1	0.235699
46.1601	2011.45	0.235753
47.7007	2007.15	0.23589
48.8554	2007.01	0.235943
48.1796	2013.67	0.236674
48.4962	2010.58	0.237545
49.093	2013.69	0.237674
47.5433	2017.09	0.237749
48.338	2012.76	0.238056
48.0183	2015.93	0.238717
45.6764	2015.96	0.238998
46.9578	2015.91	0.239447
47.2242	2017.19	0.239922
45.3033	2016.15	0.24023
47.5429	2013.74	0.24046
40.419	2012.77	0.240933
45.6764	2016.17	0.241138
45.6764	2016.01	0.241162
48.0617	2016.06	0.241443
48.2315	2007.15	0.241673
48.0094	2011.71	0.241723
48.3777	2016.17	0.242583
44.3488	2015.93	0.242863
46.9002	2011.7	0.243624
48.3749	2008.32	0.243716
47.7552	2009.34	0.2438
47.7545	2015.96	0.244556
43.3952	2014.2	0.244683
46.2612	2009.69	0.245271
47.7016	2013.77	0.245523
45.2	2013.32	0.245585
45.1509	2011.55	0.24606
45.7885	2015.94	0.246061
47.9138	2009.43	0.246153
47.8601	2012.81	0.246593
48.6541	2016.13	0.247336
48.5418	2013.66	0.247886
47.9025	2010.62	0.247904
45.5187	2009.56	0.248348
42.8088	2007.49	0.248693
45.3577	2009.57	0.249123
47.8502	2010.69	0.249319
48.0094	2015.92	0.249585
48.4948	2008.45	0.250198
47.0596	2007.1	0.25041
49.1188	2016.12	0.250665
48.3719	2010.59	0.25098
47.7545	2010.69	0.251162
48.8057	2007	0.251492
49.1678	2016.18	0.252453
40.5801	2014.63	0.252507
44.3488	2009.57	0.252538
47.2772	2009.4	0.25258
47.9103	2012.8	0.252656
48.4725	2017.14	0.253101
48.5244	2007.14	0.253583
46.1601	2007.05	0.253947
47.6859	2007.12	0.254225
46.795	2015.93	0.254613
40.419	2012.78	0.254961
45.7875	2015.92	0.255342
46.0023	2016.09	0.256226
48.7082	2011.68	0.256364
48.7833	2016.18	0.256605
47.1178	2011.68	0.257127
44.6639	2016.17	0.257272
48.9941	2016.07	0.257883
48.9383	2012.75	0.258546
47.5403	2014.62	0.258685
44.1894	2015.99	0.258863
48.3908	2012.76	0.258966
48.8554	2016.05	0.259072
46.2656	2007.03	0.259313
48.6798	2016.03	0.259671
48.8134	2016.05	0.259683
45.4627	2015.93	0.260115
46.4748	2007.01	0.261055
47.5338	2013.78	0.261229
40.5272	2016.01	0.261234
49.0884	2008.35	0.261254
48.4651	2017.09	0.261914
47.9138	2011.51	0.262886
47.8524	2016.19	0.263166
46.7447	2011.66	0.264357
48.8004	2010.61	0.264504
47.7475	2008.43	0.265182
47.437	2011.53	0.265227
48.007	2007.14	0.265331
49.1126	2017.17	0.266105
46.1544	2009.71	0.266162
47.8502	2008.37	0.266572
45.3577	2009.56	0.266913
45.2038	2009.57	0.26738
48.3865	2010.72	0.267883
48.2061	2016.05	0.268571
46.9041	2016.01	0.268912
47.3829	2011.53	0.269894
47.8502	2016.09	0.270074
41.8555	2014.71	0.270433
48.6759	2017.17	0.270681
47.7016	2011.54	0.271583
48.4651	2017.17	0.27256
47.5882	2008.41	0.273163
40.262	2008.33	0.273919
41.6895	2009.25	0.274816
48.7032	2008.46	0.274931
46.1561	2015.98	0.275247
48.6439	2010.61	0.275289
48.8554	2012.74	0.276033
47.273	2012.65	0.276115
48.4725	2017.13	0.276194
44.3471	2016.01	0.276804
41.2175	2015.86	0.277139
49.1055	2017.17	0.27745
48.4872	2017.16	0.277512
48.3802	2016.06	0.277626
47.7475	2009.43	0.277943
45.3577	2009.57	0.278088
47.2189	2008.3	0.278549
47.9138	2016.11	0.278788
45.6281	2013.3	0.27898
48.3167	2013.67	0.280304
48.3322	2013.66	0.28073
48.4872	2011.48	0.280834
48.1662	2012.8	0.281153
46.2612	2013.22	0.281382
45.7885	2015.9	0.281432
49.0195	2016.18	0.281778
47.0649	2007.14	0.282248
47.7535	2012.67	0.282458
49.0146	2017.18	0.282903
47.2714	2009.43	0.283628
45.8413	2011.41	0.283764
48.9624	2014.97	0.284988
46.2612	2016.13	0.285553
48.7082	2016.19	0.285826
47.9138	2011.53	0.285876
48.8554	2009.31	0.285946
48.0592	2010.65	0.286344
42.171	2014.72	0.286819
47.2217	2017.3	0.286958
48.8624	2011.53	0.287116
47.59	2017.12	0.287418
49.0195	2007.03	0.287482
43.9232	2015.95	0.288932
47.4289	2016.16	0.28938
47.7407	2016.09	0.289957
48.8427	2017.14	0.290086
48.0014	2011.68	0.290354
48.9463	2012.77	0.290538
47.0649	2012.66	0.290781
48.6383	2013.69	0.291081
47.5292	2016.05	0.291087
45.7885	2013.3	0.291576
48.0592	2016.1	0.291994
49.1645	2016.17	0.29215
46.0023	2015.93	0.292719
48.4894	2017.15	0.293403
47.5433	2010.64	0.293624
49.3123	2013.66	0.294066
47.2574	2007.04	0.294987
45.4697	2015.93	0.295351
46.9578	2010.7	0.296057
44.559	2016.19	0.29699
47.8502	2015.94	0.297011
48.0503	2016.06	0.297228
48.0014	2016.05	0.297391
47.8609	2013.66	0.297708
47.1162	2017.3	0.297972
47.2227	2008.44	0.298802
47.5958	2015.97	0.299176
46.3194	2013.2	0.299328
48.8427	2012.76	0.300693
49.4237	2016.19	0.300908
48.2184	2008.45	0.301126
47.7545	2007.14	0.301185
49.1572	2016.16	0.30125
48.7067	2008.3	0.301657
48.5168	2017.17	0.301733
48.1763	2011.71	0.302319
47.3821	2010.69	0.302381
46.2612	2009.69	0.303324
48.0721	2015.93	0.303504
48.7067	2010.58	0.3038
49.0172	2012.72	0.304948
49.0172	2007.08	0.305153
47.2227	2014.17	0.305739
47.5375	2013.66	0.306075
41.6431	2014.72	0.306411
48.6439	2009.31	0.306724
46.9557	2014.13	0.30789
47.437	2009.39	0.308663
45.3621	2009.56	0.308664
47.7475	2013.7	0.308978
49.4306	2015.95	0.309141
47.9138	2011.7	0.310217
48.3802	2008.45	0.31085
47.7475	2011.52	0.311105
48.4791	2013.68	0.311646
49.0018	2016.18	0.311957
47.5429	2012.7	0.312009
41.9612	2014.72	0.312155
47.8524	2012.77	0.312176
48.866	2016.03	0.312251
47.5882	2010.57	0.312451
48.5439	2010.58	0.312601
48.0203	2013.82	0.312799
44.3488	2015.9	0.312857
47.8524	2016.08	0.312916
45.1439	2015.93	0.313296
47.8609	2010.67	0.313322
44.5065	2015.99	0.313347
47.7023	2017.18	0.313482
48.9941	2016.12	0.313639
48.0535	2016.02	0.313827
47.9025	2010.7	0.314171
48.3825	2010.72	0.314354
48.7082	2013.69	0.31466
47.7475	2013.79	0.315066
41.6895	2014.61	0.315157
46.9557	2010.59	0.315552
46.7392	2013.25	0.315584
44.3488	2015.92	0.31634
49.0146	2016.05	0.317335
45.6745	2009.6	0.317716
45.0421	2013.28	0.318291
47.5882	2015.92	0.318414
48.2095	2012.73	0.318704
48.4759	2017.1	0.318723
47.7523	2013.8	0.318786
45.3033	2011.44	0.318792
47.5433	2010.71	0.318858
48.9339	2008.35	0.318972
45.1964	2009.7	0.3193
48.3865	2008.3	0.319472
49.4111	2008.33	0.319833
47.3829	2010.69	0.320142
45.8374	2009.64	0.320559
49.252	2017.18	0.321082
48.6525	2016.13	0.322269
45.9425	2016.01	0.32243
45.6809	2013.31	0.323568
48.007	2012.71	0.323644
48.9672	2010.64	0.323877
49.0146	2008.31	0.324347
40.419	2012.76	0.324551
48.7872	2016.17	0.324768
48.8427	2017.14	0.324956
47.2189	2011.51	0.325455
44.4045	2009.56	0.325962
48.9624	2007.04	0.327046
47.5882	2016.18	0.32757
44.5651	2016.02	0.32784
49.1055	2016.07	0.328283
44.9906	2011.53	0.328502
47.5958	2012.7	0.32852
47.7475	2015.95	0.328602
48.8118	2012.65	0.329203
44.6718	2011.44	0.32958
45.3577	2009.56	0.329585
48.9567	2008.31	0.330152
48.3255	2011.59	0.330318
45.6291	2011.51	0.33232
48.8057	2012.76	0.332713
44.3518	2015.96	0.333045
48.6798	2017.1	0.333181
48.8148	2013.68	0.333513
47.5882	2013.8	0.333965
46.1544	2007.02	0.333999
45.8374	2011.54	0.334033
45.7848	2013.28	0.334561
45.9442	2014.47	0.335397
49.161	2016.17	0.335471
46.1544	2013.25	0.335661
40.419	2012.78	0.336265
45.6764	2016.17	0.336281
49.1126	2007.03	0.33637
48.007	2015.95	0.336489
48.8643	2013.75	0.337042
47.437	2016.02	0.337969
44.1858	2015.92	0.338011
45.5215	2015.92	0.338084
48.8427	2017.14	0.338139
48.064	2011.55	0.338608
44.0856	2016.11	0.338698
45.4687	2013.3	0.339896
47.4358	2013.78	0.340704
47.7523	2011.7	0.340774
45.6781	2011.55	0.3412
49.1055	2012.76	0.341222
48.0731	2013.66	0.342595
47.9025	2016.12	0.342664
44.8252	2016.03	0.342716
49.0054	2008.31	0.342975
48.4962	2017.16	0.343263
45.6764	2016.01	0.344031
47.8502	2013.77	0.345162
47.3782	2012.67	0.345326
47.2714	2008.3	0.345386
48.8495	2016.05	0.34581
44.0788	2016.01	0.345983
47.1137	2012.68	0.346366
48.835	2008.33	0.347563
46.4237	2011.43	0.347813
48.2324	2016.08	0.348314
48.7872	2012.77	0.348668
47.8502	2010.71	0.348976
47.4337	2011.54	0.349194
48.8462	2007	0.349814
46.2612	2009.7	0.349818
48.9424	2016.16	0.350248
45.3081	2009.56	0.350252
44.4014	2015.91	0.351358
48.0617	2012.79	0.351854
48.9672	2009.34	0.352269
46.3155	2011.39	0.352424
49.0087	2007.03	0.352693
47.59	2011.57	0.353486
48.0183	2010.71	0.353555
48.6541	2013.67	0.353645
48.9672	2017.18	0.35429
49.1645	2007.14	0.354842
48.1575	2016.11	0.354854
45.3577	2009.57	0.355
45.6291	2007.44	0.355447
47.59	2016.12	0.35593
48.4725	2013.67	0.356338
47.4307	2017.13	0.356675
47.3645	2015.99	0.356857
48.007	2012.68	0.357058
47.738	2007.13	0.357149
47.5375	2010.7	0.357646
47.5882	2010.71	0.357903
46.9017	2011.71	0.358417
47.9138	2012.66	0.358553
48.0094	2017.3	0.358584
48.8118	2016.08	0.358651
44.3488	2015.91	0.359751
47.437	2017.2	0.359909
45.3103	2013.25	0.360321
48.0617	2008.31	0.360623
49.1709	2016.19	0.360647
48.6487	2016.19	0.361045
49.1445	2008.34	0.361367
45.4645	2013.3	0.362104
49.0172	2009.34	0.362118
45.3033	2009.7	0.362404
48.8525	2017.17	0.362435
46.7984	2016.18	0.362596
47.4307	2011.71	0.36261
48.5395	2011.47	0.363018
48.4759	2017.16	0.363188
47.4289	2017.13	0.364688
49.3163	2016.18	0.364925
45.2014	2016.05	0.365262
47.8561	2012.81	0.365276
46.105	2011.4	0.365702
46.4788	2009.69	0.365881
49.2646	2008.3	0.366053
48.4962	2009.3	0.366214
46.4788	2016.02	0.367216
45.517	2009.62	0.367431
47.8502	2010.69	0.36768
47.3821	2011.7	0.368093
49.1572	2016.06	0.368519
42.3305	2014.69	0.368638
44.3488	2015.92	0.369044
48.3882	2017.13	0.369304
47.59	2009.42	0.36979
48.7051	2011.56	0.369967
46.3137	2009.71	0.370372
46.161	2007.04	0.370907
48.3908	2015.94	0.371283
47.7407	2016.09	0.371701
48.0592	2010.65	0.372812
48.0592	2015.95	0.372872
47.8609	2008.3	0.373135
47.3836	2009.41	0.373523
40.4212	2012.76	0.373859
44.8777	2009.56	0.375075
48.5369	2015.9	0.375142
46.3137	2016.08	0.375247
48.9981	2008.32	0.375276
48.6351	2009.33	0.375912
48.9649	2017.17	0.376384
48.3825	2017.1	0.376725
48.7082	2016.18	0.37808
48.0617	2013.82	0.378239
46.9002	2011.61	0.378262
49.1188	2016.12	0.378749
48.0592	2010.56	0.379142
45.6291	2009.66	0.379531
44.0264	2016.18	0.379614
44.7256	2009.67	0.37968
48.808	2008.3	0.37971
44.7202	2016.03	0.380355
48.8525	2009.31	0.380394
48.7051	2008.3	0.380515
47.9138	2017.27	0.381021
48.9339	2013.7	0.381267
48.3846	2017.14	0.381428
48.3134	2015.92	0.381896
49.0117	2012.73	0.382217
48.3749	2017.19	0.382489
48.3199	2015.91	0.383538
47.6951	2013.68	0.383989
48.2303	2010.71	0.384667
46.2612	2009.7	0.384731
45.8389	2013.31	0.384744
47.0611	2012.65	0.385356
49.1091	2016.18	0.385658
42.2778	2014.71	0.386023
47.5433	2017.09	0.386037
45.9487	2013.32	0.386042
47.6951	2017.26	0.387691
46.4249	2016.05	0.388024
47.6983	2017.26	0.388026
48.9649	2009.32	0.388137
46.1544	2016.16	0.388255
44.2382	2015.92	0.388542
48.9624	2008.31	0.389034
47.2172	2007.09	0.389166
48.8624	2008.31	0.389655
46.426	2015.92	0.389691
47.2772	2016.15	0.389701
46.9049	2015.93	0.390189
47.9138	2011.5	0.390361
44.5123	2015.98	0.390929
49.1572	2012.76	0.39128
48.4973	2007.04	0.391922
49.0146	2012.72	0.392479
49.0087	2010.63	0.392542
46.7409	2015.94	0.393414
49.149	2013.69	0.393854
44.3488	2015.91	0.3939
47.9025	2010.62	0.394255
45.6238	2011.53	0.394327
47.4365	2011.68	0.394417
47.8601	2012.65	0.394816
49.3201	2016.16	0.395013
48.5458	2011.5	0.395779
48.6507	2010.58	0.396619
49.0146	2014.97	0.397002
47.9025	2013.69	0.39721
44.8312	2009.56	0.397211
48.6798	2015.92	0.397386
48.3777	2011.6	0.397506
45.2027	2009.57	0.397824
48.0043	2013.73	0.397961
48.866	2013.71	0.398566
48.6412	2008.34	0.398959
47.5358	2007.15	0.399379
47.8609	2007.12	0.39978
47.0623	2012.67	0.399826
45.6764	2015.95	0.400067
44.7256	2016.12	0.400087
47.859	2012.64	0.400115
46.3194	2015.94	0.40094
48.6507	2016.16	0.401474
47.4289	2010.56	0.40165
48.2289	2017.09	0.401829
44.3488	2015.92	0.402599
48.3908	2017.15	0.402975
41.6895	2009.25	0.402998
49.1645	2008.3	0.403015
46.1019	2011.4	0.403464
45.3033	2011.52	0.403885
47.4365	2014.75	0.404736
48.7051	2009.29	0.404962
45.6745	2009.66	0.405849
47.4323	2016.11	0.407015
47.2236	2017.22	0.407742
46.2612	2009.7	0.408221
47.5358	2016.15	0.408504
48.9672	2017.22	0.408641
47.0643	2011.51	0.408692
48.007	2010.69	0.40899
46.8985	2009.56	0.409393
43.9232	2016.19	0.410084
45.7832	2009.68	0.410187
45.7832	2007.44	0.410327
48.4915	2011.58	0.410386
48.8603	2007.01	0.410506
47.6951	2013.8	0.411313
46.1544	2007.15	0.411564
47.8544	2015.93	0.411924
46.2612	2009.71	0.412935
46.6381	2011.65	0.413198
44.3488	2015.91	0.413735
48.0731	2017.29	0.414135
49.0195	2016.18	0.414708
48.7011	2016.19	0.414977
45.6796	2013.31	0.415699
46.2612	2015.95	0.4157
47.7007	2013.8	0.416892
44.3488	2015.92	0.416994
48.9534	2007.02	0.41705
47.751	2011.56	0.417278
48.7082	2016.19	0.417959
46.5816	2016.03	0.417991
47.7545	2012.69	0.418203
48.007	2016.15	0.418561
44.9894	2015.99	0.418876
47.5433	2017.21	0.419011
46.6381	2013.18	0.419422
46.6341	2016.02	0.419903
41.3241	2012.74	0.420338
46.2612	2009.71	0.42052
45.1439	2011.45	0.420942
47.9128	2008.3	0.421258
47.6931	2007.09	0.421808
46.2612	2009.71	0.421957
46.2643	2015.98	0.422696
44.4057	2016.13	0.423034
47.2696	2013.69	0.423482
45.1964	2016.13	0.424193
45.9442	2009.57	0.424457
44.7256	2016.18	0.425046
47.4337	2012.65	0.425403
46.1544	2015.92	0.426199
44.2402	2015.93	0.426621
40.2066	2012.77	0.427203
45.7875	2016.05	0.42755
48.3825	2015.92	0.428354
46.2666	2016	0.428549
46.426	2009.67	0.428796
45.6764	2016.16	0.429092
47.2217	2016.1	0.430006
47.1178	2016	0.430054
46.7392	2016.11	0.431433
48.0014	2016.02	0.432789
47.8524	2016.19	0.432947
45.6745	2009.6	0.434375
47.8544	2013.67	0.434787
47.0596	2009.68	0.434974
49.1091	2012.81	0.435203
48.839	2013.66	0.435439
45.3577	2009.56	0.435725
48.1709	2016.07	0.435818
47.5358	2015.92	0.43613
49.1678	2016.18	0.436417
48.7872	2017.13	0.436682
47.539	2013.8	0.437031
45.517	2013.25	0.437486
47.4337	2017.26	0.43865
45.7885	2011.55	0.43894
46.1544	2013.16	0.439697
47.5916	2009.43	0.440271
47.3797	2014.61	0.44068
47.2755	2017.24	0.440901
48.0183	2016.08	0.44129
48.0731	2007.15	0.441887
47.8609	2017.22	0.441905
45.4645	2015.99	0.442759
45.5226	2009.59	0.443118
48.3777	2017.09	0.443238
47.9138	2010.69	0.443273
48.221	2013.82	0.443288
49.0117	2008.3	0.443301
47.8502	2010.71	0.443434
45.3033	2009.57	0.443785
40.419	2012.78	0.443818
47.2772	2008.42	0.444725
48.7872	2015.9	0.445181
40.419	2012.76	0.445501
46.4222	2015.95	0.446175
46.4206	2007.15	0.446426
45.9968	2014.5	0.446904
47.9138	2011.53	0.447005
45.1964	2015.95	0.447113
45.3067	2013.31	0.447318
49.4237	2016.19	0.448005
48.5369	2013.68	0.448744
45.1509	2011.39	0.449239
48.6836	2017.09	0.449472
45.6764	2016.01	0.449494
46.6397	2009.7	0.449733
49.0195	2007.03	0.449866
47.4323	2014.64	0.449965
45.3051	2013.3	0.450538
45.3033	2011.45	0.451248
47.8561	2012.64	0.451723
46.2612	2013.22	0.451745
47.6968	2017.26	0.452226
48.4725	2017.12	0.452721
47.3829	2017.23	0.452959
47.0643	2011.68	0.45311
48.8427	2017.15	0.453114
48.8118	2011.68	0.453719
48.4567	2017.17	0.454037
48.5474	2017.15	0.45442
46.4788	2013.19	0.454907
46.1544	2013.24	0.455356
48.338	2017.27	0.455792
47.8502	2010.69	0.456478
40.5807	2012.75	0.456537
48.6555	2011.48	0.456823
47.5951	2017.24	0.457164
48.2061	2016.15	0.457201
48.3228	2012.76	0.457367
47.0634	2009.66	0.457977
47.5429	2013.74	0.458347
47.5375	2017.1	0.458614
45.9968	2013.32	0.459036
49.0146	2008.31	0.459537
48.8427	2017.14	0.46071
44.8286	2015.92	0.461767
48.5501	2011.63	0.461923
48.0535	2016.08	0.462339
48.3228	2016.03	0.462492
49.3163	2013.82	0.462825
45.7832	2016.1	0.46332
47.7016	2007.13	0.463512
48.6464	2017.16	0.46353
47.859	2011.55	0.463553
47.9025	2008.36	0.463616
48.0592	2010.64	0.463889
48.839	2017.16	0.464478
44.3488	2016	0.465131
48.2324	2013.66	0.465772
48.5501	2012.73	0.466331
48.5279	2017.11	0.466409
48.8624	2010.56	0.466454
48.3098	2012.74	0.467767
49.1188	2013.7	0.467796
46.3194	2009.7	0.467823
48.2324	2012.65	0.468041
48.7067	2014.98	0.468213
48.5311	2010.62	0.46844
49.1126	2007.15	0.470429
48.6439	2016.18	0.470738
48.3616	2016.05	0.470853
49.0146	2007.07	0.470952
47.9128	2011.47	0.471496
48.8525	2016.05	0.471794
47.2236	2011.52	0.473035
44.7183	2016.19	0.473311
47.4358	2012.67	0.475508
48.4725	2017.14	0.47559
46.9568	2011.67	0.475754
47.0611	2016.12	0.478285
48.5501	2016.02	0.478735
49.1532	2016.07	0.478755
46.9557	2011.66	0.479217
49.3123	2017.16	0.479328
48.007	2012.68	0.479416
48.007	2007.13	0.479535
45.3577	2009.57	0.480119
48.3228	2017.19	0.480286
45.6269	2016.04	0.480616
48.6555	2016.16	0.480752
49.1532	2016.12	0.481156
46.2612	2016.13	0.481162
48.9672	2007.02	0.481227
48.3749	2007.02	0.481547
45.6764	2007.5	0.481547
48.064	2008.46	0.481753
47.3765	2012.65	0.481875
48.9672	2016.03	0.482077
44.6676	2015.94	0.482962
45.9487	2015.96	0.483731
48.81	2012.81	0.483769
48.4948	2010.72	0.48382
48.8603	2010.59	0.484045
46.7466	2009.7	0.484212
47.7494	2013.81	0.484648
47.2242	2011.51	0.484729
47.0611	2013.28	0.484943
49.161	2012.81	0.485612
48.7082	2016.18	0.485833
46.4249	2009.71	0.486099
47.5338	2013.78	0.486109
47.2714	2017.09	0.486386
45.7832	2011.5	0.486554
47.3836	2012.7	0.4866
46.6381	2009.7	0.486781
44.3504	2016	0.488328
48.8134	2013.76	0.489286
45.7832	2016.06	0.490859
45.3577	2015.97	0.491017
45.8422	2015.96	0.491412
45.8422	2013.3	0.491433
45.0433	2015.99	0.491512
47.2189	2010.69	0.491521
47.2189	2014.63	0.491958
41.5331	2014.72	0.492393
44.8796	2016.02	0.492405
47.4166	2015.99	0.492554
49.161	2017.16	0.492653
49.3123	2008.31	0.493021
48.5501	2007.06	0.493224
47.6951	2011.55	0.493623
48.839	2017.13	0.494294
45.0444	2011.51	0.494957
44.5123	2016.14	0.495002
48.3019	2017.19	0.495352
42.2747	2014.7	0.495397
47.7007	2017.25	0.495443
48.839	2015.91	0.495468
43.9248	2016.19	0.496619
47.5375	2008.45	0.496807
46.0016	2013.33	0.497672
48.1796	2015.99	0.497808
49.1015	2016.07	0.497979
48.0535	2013.71	0.498225
47.9047	2016.19	0.4985
49.1091	2016.06	0.498835
47.5292	2007.08	0.498851
47.7407	2016.08	0.498885
49.2606	2016.17	0.499407
48.6836	2017.17	0.499569
48.7094	2013.71	0.499581
48.4689	2016.19	0.500816
46.2666	2009.7	0.500844
46.637	2015.94	0.501896
48.81	2012.8	0.501938
45.6269	2013.32	0.502056
47.6983	2013.8	0.502071
48.007	2016.19	0.502208
47.8609	2013.8	0.502789
44.7183	2015.91	0.502907
47.2714	2010.69	0.503632
48.8624	2014.95	0.504884
48.4791	2009.33	0.505233
48.2324	2013.81	0.505354
47.1171	2015.98	0.505781
48.8134	2017.3	0.506401
47.437	2008.34	0.50655
47.2204	2012.65	0.506581
48.7082	2016.19	0.506646
48.4791	2008.37	0.506825
49.1158	2016.08	0.507098
47.8502	2010.7	0.507567
47.5358	2017.14	0.507593
47.7494	2008.44	0.508593
44.1877	2015.95	0.509451
46.9002	2011.7	0.510372
47.3615	2007.02	0.510574
48.1687	2010.56	0.510631
46.4249	2016	0.511239
48.4847	2011.6	0.511307
47.5375	2017.1	0.511467
46.1544	2013.16	0.511513
48.9649	2014.94	0.511632
49.1188	2016.12	0.51173
48.81	2012.81	0.511946
45.0433	2009.6	0.512594
47.4307	2010.71	0.512712
45.6255	2013.31	0.512861
47.1061	2007.02	0.513045
46.9528	2009.71	0.513418
48.866	2016.03	0.513554
48.0014	2014.96	0.513595
46.2612	2007.04	0.513759
48.007	2012.71	0.514003
48.1796	2013.8	0.514125
48.3777	2012.8	0.514862
48.5244	2017.11	0.51502
49.1055	2008.32	0.515049
47.8524	2011.52	0.515109
48.4872	2013.66	0.515234
47.8502	2010.69	0.51538
49.4237	2016.19	0.515623
48.9649	2017.1	0.516139
45.3033	2015.98	0.516409
48.6555	2011.7	0.516973
47.5882	2016.18	0.51711
45.6291	2007.44	0.517191
49.0195	2016.18	0.517438
47.9128	2007.15	0.517559
49.149	2017.18	0.517756
47.384	2007.03	0.518172
42.7512	2007.49	0.518239
48.3616	2015.93	0.518916
47.6859	2016.08	0.519352
46.0023	2015.92	0.519906
45.6764	2016.16	0.519913
41.3736	2014.72	0.520715
47.8422	2016.07	0.521004
47.2236	2012.69	0.521068
47.8609	2014.86	0.521141
47.6885	2016.08	0.52144
49.1645	2016.18	0.522779
48.1747	2012.79	0.523371
47.0611	2010.68	0.523692
44.9906	2015.98	0.524181
46.9578	2016.16	0.524201
47.8502	2013.77	0.52432
48.3255	2016.19	0.525092
49.1015	2016.13	0.525104
47.6951	2011.7	0.526331
48.8643	2016.05	0.526476
47.3829	2012.68	0.526586
48.8554	2017.16	0.52663
47.6968	2011.56	0.526833
47.2772	2017.21	0.527332
45.4697	2016.09	0.52736
44.5651	2011.49	0.527522
46.4777	2007.03	0.527737
47.6885	2016.08	0.528399
47.3797	2017.27	0.529486
46.7462	2009.69	0.529745
47.5882	2010.71	0.529998
48.835	2012.76	0.530511
45.8338	2009.6	0.530859
48.1787	2011.71	0.530959
47.0634	2012.69	0.532374
48.7833	2008.33	0.532543
47.6885	2012.72	0.533083
45.9469	2011.4	0.533389
47.8524	2015.91	0.533559
48.4759	2013.67	0.533836
47.8391	2016.06	0.535097
45.5226	2015.92	0.535572
41.6895	2009.25	0.535641
45.6269	2009.56	0.535644
48.4759	2017.1	0.53568
48.0592	2016.19	0.5357
48.4894	2015.91	0.535844
46.5854	2013.19	0.535858
48.8134	2017.21	0.536601
48.6158	2017.09	0.537753
47.9138	2011.5	0.539063
47.8502	2009.38	0.53984
45.3093	2009.56	0.540626
47.8502	2010.7	0.541061
48.6541	2011.49	0.541126
48.7975	2012.73	0.541302
48.7082	2016.18	0.542249
48.4689	2013.68	0.542488
48.0617	2008.47	0.543184
47.6885	2016.08	0.543383
47.859	2010.69	0.543388
47.0623	2010.69	0.543561
47.8502	2010.7	0.54365
40.6841	2014.72	0.543738
46.5816	2015.95	0.544612
47.8911	2016.06	0.544895
45.0406	2015.91	0.544985
48.7082	2011.56	0.5451
48.3719	2015.92	0.545415
44.7183	2016.01	0.545589
47.9025	2010.63	0.545686
48.9649	2007.04	0.545758
43.9248	2015.96	0.546262
44.827	2015.91	0.54682
46.9049	2016.13	0.547355
45.517	2016.19	0.548227
48.7082	2016.19	0.548316
47.8524	2013.82	0.548516
49.0054	2016.18	0.548755
47.1162	2010.7	0.548942
48.3777	2008.46	0.549167
47.7475	2010.71	0.549345
45.6238	2009.6	0.549711
49.4306	2015.95	0.550142
44.5608	2011.54	0.550447
47.3765	2016.1	0.550544
45.6745	2009.61	0.55079
46.1544	2009.71	0.552165
49.149	2008.34	0.552171
48.5279	2010.59	0.552503
45.8422	2007.43	0.552661
47.7016	2009.42	0.552853
48.7872	2017.16	0.552899
44.3504	2009.57	0.553466
48.3908	2010.71	0.553525
45.6764	2011.51	0.553647
46.1544	2016.05	0.553886
44.1894	2016.02	0.553937
47.2227	2014.97	0.554208
48.6961	2016.17	0.554645
45.7863	2013.32	0.554861
47.6951	2008.42	0.555831
46.4237	2007.04	0.55639
45.6764	2016.02	0.556746
48.6541	2017.15	0.557339
47.2204	2010.69	0.558273
47.8577	2011.71	0.558554
48.0592	2010.64	0.558661
49.161	2008.31	0.558764
45.9968	2015.93	0.558772
48.3865	2011.58	0.559509
47.2777	2010.61	0.562402
43.2797	2012.72	0.563447
47.5358	2010.71	0.564065
47.4289	2016.16	0.564079
45.6796	2015.91	0.564832
47.2765	2009.41	0.564888
47.8601	2016.1	0.564888
47.8609	2016.11	0.564933
47.3836	2011.53	0.564973
47.2714	2012.69	0.565116
47.4289	2008.3	0.565216
47.6885	2016.08	0.565641
47.2714	2017.14	0.56599
45.517	2016.19	0.566426
46.903	2013.18	0.566917
48.81	2012.8	0.567616
46.317	2011.43	0.5682
46.7424	2007.52	0.568307
47.751	2013.81	0.568324
46.903	2011.67	0.568713
46.1544	2013.24	0.568848
48.0014	2016.06	0.570438
47.5375	2017.1	0.570664
47.9047	2007	0.570743
48.2289	2017.1	0.571056
48.3167	2013.67	0.57156
47.7545	2011.54	0.571888
47.8524	2010.72	0.572309
46.9557	2010.69	0.57308
47.6951	2016.14	0.573105
48.1787	2008.3	0.57328
48.5418	2011.48	0.574731
47.2189	2015.99	0.574962
48.3228	2010.61	0.575361
40.419	2012.79	0.575388
48.8554	2017.09	0.575651
45.3577	2013.27	0.575775
45.1964	2009.69	0.576091
47.7475	2011.71	0.577107
45.2038	2016.09	0.578091
49.308	2008.33	0.578246
46.5799	2015.93	0.5784
48.007	2013.68	0.578758
47.9047	2015.91	0.579148
48.9383	2013.69	0.579387
48.0592	2010.56	0.579546
45.6764	2015.95	0.579808
45.3033	2011.45	0.580734
47.7475	2015.95	0.581027
47.5433	2017.1	0.581034
47.2189	2012.7	0.581847
48.9463	2017.16	0.582732
45.3577	2009.56	0.582744
48.482	2013.68	0.582852
46.1544	2013.17	0.583577
47.2107	2007.01	0.583847
45.9442	2014.47	0.584168
48.81	2012.81	0.584178
45.4627	2015.94	0.584932
49.0974	2012.74	0.584999
47.5358	2009.41	0.585913
46.9578	2010.56	0.586587
48.4962	2008.45	0.586602
47.6799	2016.04	0.58709
48.1787	2013.82	0.587093
47.6997	2013.8	0.587987
45.6745	2009.66	0.588076
45.0371	2009.7	0.588259
44.3996	2011.52	0.58859
46.9568	2016	0.589291
48.8624	2013.8	0.589591
47.5958	2012.81	0.590052
46.0023	2009.69	0.590379
49.0195	2016.19	0.590418
48.95	2017.11	0.591107
45.6238	2013.27	0.591139
47.738	2016.08	0.592474
48.007	2012.68	0.592772
47.9128	2010.7	0.59284
47.5942	2016.1	0.592845
46.4249	2013.16	0.592951
49.0117	2007.04	0.593071
47.5963	2010.72	0.593484
47.6885	2016.09	0.593526
48.5474	2016.13	0.593883
45.3621	2013.3	0.595243
49.0018	2017.1	0.5962
46.4222	2011.41	0.596601
48.4689	2017.09	0.597268
47.1178	2007.15	0.597336
47.7023	2007.05	0.597396
48.2184	2016.18	0.597593
48.9672	2017.18	0.597637
48.4791	2017.18	0.597865
47.5429	2010.69	0.597917
48.2184	2010.56	0.59845
46.6341	2015.97	0.599142
48.9672	2009.34	0.599217
48.3369	2015.93	0.599645
45.0433	2013.26	0.599868
44.8777	2016.19	0.600368
40.2089	2012.77	0.601387
48.0731	2013.82	0.602162
48.0203	2015.95	0.602429
46.7984	2014.17	0.602919
48.3098	2016.17	0.603052
46.7447	2014.15	0.603469
49.093	2008.34	0.603506
45.3103	2011.41	0.603593
45.2	2015.95	0.603597
47.7545	2013.79	0.604375
40.419	2012.76	0.604404
45.8389	2015.92	0.604733
45.4627	2016.05	0.605006
46.161	2016.03	0.606021
49.0172	2007.09	0.606858
48.7975	2010.62	0.607293
47.3723	2007.15	0.607295
45.6764	2016.16	0.608261
48.8427	2010.62	0.610006
47.9086	2015.93	0.610051
48.1796	2008.45	0.610328
48.2289	2015.92	0.610337
49.1678	2016.18	0.610338
45.517	2016.19	0.610495
47.5423	2009.42	0.611019
48.2095	2016.05	0.612073
48.2095	2016.05	0.612073
48.7067	2013.67	0.612214
47.8502	2012.69	0.61232
46.105	2007.05	0.61291
47.7016	2010.69	0.613031
47.0634	2015.97	0.613264
47.9025	2010.69	0.61336
48.9672	2008.37	0.613593
45.4661	2015.91	0.614015
46.7984	2007.01	0.614179
47.7545	2016.08	0.614191
46.2612	2013.21	0.614642
45.4697	2009.63	0.614753
44.0808	2015.93	0.614963
47.9068	2013.66	0.615331
44.6639	2015.98	0.615956
48.2324	2017.13	0.6162
46.7447	2015.93	0.617885
48.5489	2015.9	0.617946
48.8118	2008.3	0.618666
47.5882	2009.4	0.618697
45.5187	2013.32	0.619313
48.2324	2012.76	0.619526
48.95	2012.76	0.619998
48.5311	2012.75	0.620186
46.9568	2010.56	0.621001
48.482	2008.34	0.62315
48.4725	2016.04	0.623577
49.0195	2007.03	0.623879
45.3033	2011.51	0.6254
47.9047	2014.87	0.62633
44.403	2016.02	0.626455
48.7051	2016.15	0.627068
46.9041	2013.22	0.627116
48.3199	2013.66	0.627374
48.5489	2012.75	0.62771
48.808	2009.29	0.628181
41.3749	2014.72	0.628871
48.5244	2013.68	0.628963
48.2184	2008.45	0.629021
47.0623	2014.12	0.630069
47.8609	2008.42	0.630448
47.9047	2013.67	0.63086
47.8577	2012.81	0.631009
49.2683	2016.15	0.631173
47.1137	2012.68	0.631462
44.0283	2015.94	0.631518
48.6412	2012.74	0.632119
44.885	2015.98	0.63232
47.9086	2017.3	0.632629
47.5815	2007.07	0.632762
47.6885	2016.07	0.632854
47.2242	2007.15	0.633591
49.0195	2016.19	0.634402
47.2777	2017.3	0.634775
48.6242	2016.19	0.635278
44.5045	2016.13	0.636099
47.5882	2015.92	0.636184
44.7256	2016	0.636239
47.1137	2011.51	0.637058
48.8624	2010.72	0.637996
49.0146	2008.31	0.638073
46.7975	2007.03	0.638076
49.0195	2016.19	0.638159
41.4804	2008.33	0.638947
46.9585	2012.64	0.638964
48.6525	2009.3	0.639296
48.0203	2016.11	0.639504
44.403	2011.39	0.639862
48.835	2016.18	0.640162
48.9624	2012.73	0.640292
44.7202	2009.58	0.641765
48.3199	2013.75	0.642322
44.5082	2015.92	0.642588
47.8609	2009.4	0.642733
48.007	2016.15	0.643697
44.0788	2016.19	0.645314
44.6639	2016.16	0.64547
44.3518	2015.96	0.646162
48.7792	2013.7	0.646451
44.2451	2015.91	0.646698
47.9138	2011.53	0.646976
48.8495	2016.15	0.647358
48.8427	2017.13	0.647853
48.3846	2010.57	0.647854
47.9025	2015.95	0.648185
45.6238	2015.99	0.648252
46.9568	2010.7	0.648478
46.7935	2014.39	0.649633
49.0195	2016.19	0.649792
44.3451	2016.02	0.650253
47.5429	2011.67	0.650279
49.1188	2016.12	0.650615
48.6555	2011.6	0.65063
48.4915	2010.58	0.650687
47.2152	2007.14	0.650752
46.159	2015.93	0.650939
47.7455	2007.11	0.652621
44.83	2016.03	0.652931
48.9596	2009.31	0.652977
46.9568	2013.22	0.653472
48.7032	2016.18	0.653633
47.9025	2012.71	0.653634
45.3577	2009.58	0.654144
44.4014	2015.9	0.655101
44.0264	2015.99	0.655427
46.1544	2013.17	0.655497
48.9672	2017.23	0.655744
46.5868	2009.71	0.656292
46.9544	2013.17	0.656443
45.1983	2013.33	0.656479
48.0592	2010.64	0.656566
44.7256	2016.18	0.656814
46.7975	2011.67	0.657085
47.8601	2017.27	0.657428
48.7051	2017.14	0.658275
46.9578	2012.82	0.658447
44.7218	2009.56	0.659394
47.7319	2007.12	0.659428
48.5474	2008.45	0.659515
48.3802	2012.81	0.659678
47.6951	2014.86	0.659772
45.6819	2016.05	0.659791
47.2227	2015.97	0.659872
42.1153	2014.72	0.660249
47.8609	2016.01	0.660273
45.6781	2016.03	0.661738
49.161	2007.02	0.662435
48.8603	2011.67	0.662829
48.9424	2015.91	0.663157
40.8964	2015.94	0.663664
48.007	2012.71	0.664731
45.6764	2016.02	0.664733
45.6745	2009.61	0.664896
48.9649	2013.69	0.665106
47.5358	2016.15	0.66553
48.4725	2017.12	0.66591
44.6658	2015.92	0.66595
46.9049	2016.01	0.666127
44.5112	2011.44	0.667006
47.6951	2015.95	0.667059
48.8134	2016.05	0.667448
45.9479	2015.94	0.667826
46.583	2015.95	0.667943
48.5369	2011.48	0.668133
48.808	2010.58	0.668385
48.3616	2013.69	0.668599
47.4307	2011.56	0.668633
47.5429	2013.74	0.669696
46.4206	2007.15	0.669725
48.3255	2010.57	0.669932
48.3167	2016.15	0.670197
47.6885	2016.09	0.670216
45.6781	2009.58	0.670251
48.8462	2013.66	0.670368
48.687	2008.36	0.670378
41.6895	2009.25	0.670683
47.9138	2015.95	0.670798
46.9528	2013.33	0.671098
46.0007	2007.07	0.6712
47.5882	2013.79	0.671271
47.5963	2017.2	0.671657
47.7407	2016.08	0.671929
47.5358	2008.44	0.672059
47.7007	2014.65	0.673173
47.3829	2015.97	0.673626
41.7994	2014.72	0.673853
47.1178	2011.68	0.674789
46.1544	2013.24	0.675662
48.2095	2017.16	0.675923
46.2656	2015.97	0.676083
47.7023	2010.65	0.676252
45.3051	2015.95	0.676528
47.3765	2015.91	0.676699
47.593	2011.55	0.676893
47.384	2010.62	0.677231
46.9578	2015.9	0.678226
46.1544	2007.03	0.678357
45.15	2015.93	0.678457
47.0649	2007.14	0.678883
44.3471	2015.9	0.680398
46.9017	2011.66	0.680655
47.3765	2010.56	0.680901
48.8427	2017.15	0.680996
48.7872	2013.66	0.681664
45.517	2016.19	0.681907
48.81	2012.8	0.682124
47.8577	2012.64	0.683662
46.7392	2015.9	0.683908
48.4791	2007.03	0.684029
45.0444	2007.51	0.684777
49.2646	2016.17	0.684902
48.6798	2013.69	0.685221
48.0661	2010.56	0.685413
47.5958	2017.22	0.685614
44.191	2016.02	0.685761
48.9596	2017.17	0.686008
48.0136	2008.3	0.686152
47.8502	2013.78	0.686926
47.4323	2011.7	0.687168
46.2612	2016.13	0.687411
47.5882	2010.57	0.687649
43.3939	2014.2	0.688254
45.9479	2011.43	0.689384
48.007	2007.13	0.689386
47.9025	2013.69	0.689599
45.7885	2015.91	0.689727
45.6809	2015.91	0.689803
48.6383	2008.36	0.689836
47.0649	2012.82	0.690488
45.7885	2015.93	0.691146
47.5815	2016.07	0.691194
45.6796	2016.04	0.6919
47.3674	2015.96	0.6928
44.7256	2016.12	0.693393
47.7475	2013.79	0.693945
45.6764	2016.16	0.693987
46.7392	2009.64	0.69424
48.007	2012.69	0.694276
45.9968	2016.04	0.694377
48.0116	2010.56	0.695101
46.6391	2007.04	0.695235
47.1171	2017.22	0.696166
47.7552	2007.05	0.696878
49.161	2012.76	0.696993
48.5439	2011.49	0.697447
48.5207	2017.09	0.6975
48.9567	2010.62	0.697506
45.5202	2013.32	0.698602
45.517	2013.24	0.698647
48.81	2012.82	0.698663
47.9138	2012.66	0.698878
44.191	2016.02	0.699767
48.81	2014.98	0.69979
43.075	2012.72	0.699882
47.9025	2010.63	0.700109
47.3782	2017.11	0.700151
47.0611	2017.18	0.700165
47.2777	2016.12	0.700321
45.8413	2015.93	0.7006
46.2612	2015.95	0.700974
47.3782	2012.82	0.701027
46.9017	2007.05	0.701036
48.3199	2007.15	0.701111
49.1532	2017.17	0.701193
44.4045	2011.43	0.701449
47.5403	2017.26	0.701593
48.8148	2013.67	0.702748
48.866	2016.02	0.702801
47.0634	2017.21	0.703986
48.7011	2017.09	0.704053
48.8579	2013.66	0.704416
47.1178	2016.18	0.705082
47.3782	2014.67	0.705094
40.2603	2012.75	0.705287
46.6341	2013.33	0.705363
46.0023	2015.92	0.705615
47.9138	2011.5	0.706163
45.3033	2011.45	0.706529
46.3155	2007.04	0.706812
48.0592	2016.1	0.707192
47.6968	2015.95	0.707276
47.437	2010.67	0.707635
49.1645	2016.18	0.709737
40.6852	2014.62	0.709816
47.437	2016.06	0.709933
47.2696	2007.14	0.70995
48.017	2017.3	0.710628
47.7475	2017.27	0.710833
48.2324	2009.42	0.71093
47.0643	2010.69	0.710985
46.7917	2016.05	0.711605
48.4759	2017.1	0.713209
47.4135	2007.04	0.713557
44.8839	2009.56	0.713679
44.5065	2009.62	0.713919
48.2184	2010.73	0.714202
45.6291	2007.44	0.714447
48.2324	2007.09	0.714631
48.007	2008.35	0.715058
49.1709	2016.18	0.715585
46.7964	2014.12	0.716384
48.9463	2017.11	0.717322
48.808	2011.69	0.717776
47.5358	2017.28	0.717782
45.517	2011.4	0.71785
47.4337	2011.7	0.717988
44.7202	2011.55	0.718653
47.59	2012.69	0.718817
48.8032	2014.98	0.718843
45.6781	2013.29	0.719003
45.9968	2014.5	0.719763
47.437	2007.09	0.719921
48.8118	2010.71	0.720554
46.7447	2013.21	0.721662
47.273	2009.43	0.722035
41.6399	2014.72	0.722203
48.0014	2011.67	0.722227
45.6764	2009.66	0.722551
47.3745	2017.28	0.722863
47.5375	2017.09	0.722994
46.4788	2016.07	0.723169
46.1062	2011.42	0.723756
48.1796	2013.67	0.723814
47.2236	2009.4	0.723908
48.2315	2015.94	0.724166
45.9996	2011.39	0.72426
48.064	2010.71	0.724408
47.5338	2013.78	0.724684
46.9544	2009.71	0.725621
49.0117	2008.46	0.726137
47.5882	2010.71	0.726485
46.1544	2013.17	0.726555
47.7475	2016.15	0.726624
45.7832	2016.1	0.726827
48.9567	2016.05	0.726875
48.7032	2011.57	0.726927
40.419	2012.79	0.727184
48.6987	2017.16	0.72737
49.093	2017.18	0.727917
44.5608	2015.93	0.728703
45.3103	2015.95	0.729368
46.7935	2016.03	0.729695
49.0087	2009.31	0.729751
48.3322	2017.13	0.729791
47.5358	2010.56	0.729807
47.6968	2011.7	0.72992
48.5395	2015.91	0.730487
47.6885	2016.07	0.730504
44.9906	2009.61	0.730952
47.9117	2008.45	0.732378
48.5311	2008.37	0.732614
47.5882	2016.18	0.733067
46.1019	2009.57	0.733081
48.9463	2008.32	0.733416
48.338	2011.58	0.733983
48.5369	2007.01	0.734305
48.8643	2017.28	0.734428
47.7319	2016.04	0.735115
46.2666	2013.22	0.736166
45.4645	2009.57	0.736481
48.5489	2009.3	0.736639
46.9041	2011.66	0.73672
45.9442	2013.31	0.736801
40.8424	2014.6	0.7372
47.3765	2008.46	0.737642
45.4697	2011.39	0.738286
47.3765	2012.8	0.739423
47.6931	2007.09	0.740081
48.4962	2007.13	0.740138
48.0014	2016.02	0.740318
[truncated: 211,319+ more rows]
